# Supplementary material for: Crystal structure of the triphenyltin(IV) chloride dimethyl N -cyanodithioiminocarbonate adduct
Source: publisher site journal article supplement (doi:10.1515/mgmc-2016-0015), 2016-06-19
Supplement: Supplementary file 1 [file mgmc-2016-0015_Suppl.docx]

**Crystal structure of the triphenyltin(IV) chloride dimethyl *N*-cyanodithioiminocarbonate adduct**

Mouhamadou Birame Diop, Yaya Sow, Libasse Diop,

Laurent Plasseraud and Hélène Cattey

**Supplementary material**

- **Figure S1** Middle infrared spectra (ATR) of (a) **L** and (b) **1**.
- **Figure S2** Far infrared spectra (ATR) of (a) Ph3SnCl, (b) **1** and (c) **L**.
- **Figure S3** 1H NMR spectrum of **1** (CDCl3, 300 K).
- **Figure S4** 13C{1H} NMR spectrum of **1** (CDCl3, 300 K).
- **Figure S5** 119Sn{1H} NMR spectrum of **1** (CDCl3, 300 K).
- **Figure S6** *δ*(119Sn{1H}) versus concentration of **1** (CD2Cl2, 300 K): (a) 2 M, (b) 1 M and (c) 0.5 M.
- **Figure S7** Middle Infrared spectra (transmission) of (a) **L** and (b) **1** in dichloromethane solution.

**
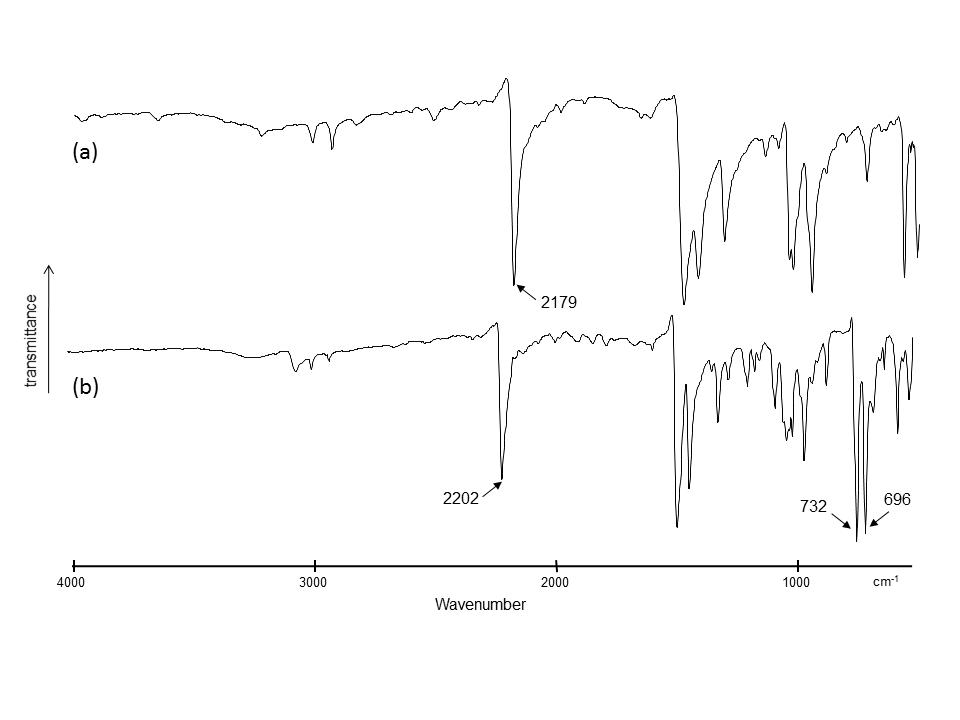
Figure S1.** Middle infrared spectra (ATR) of (a) **L** and (b) **1**.

**
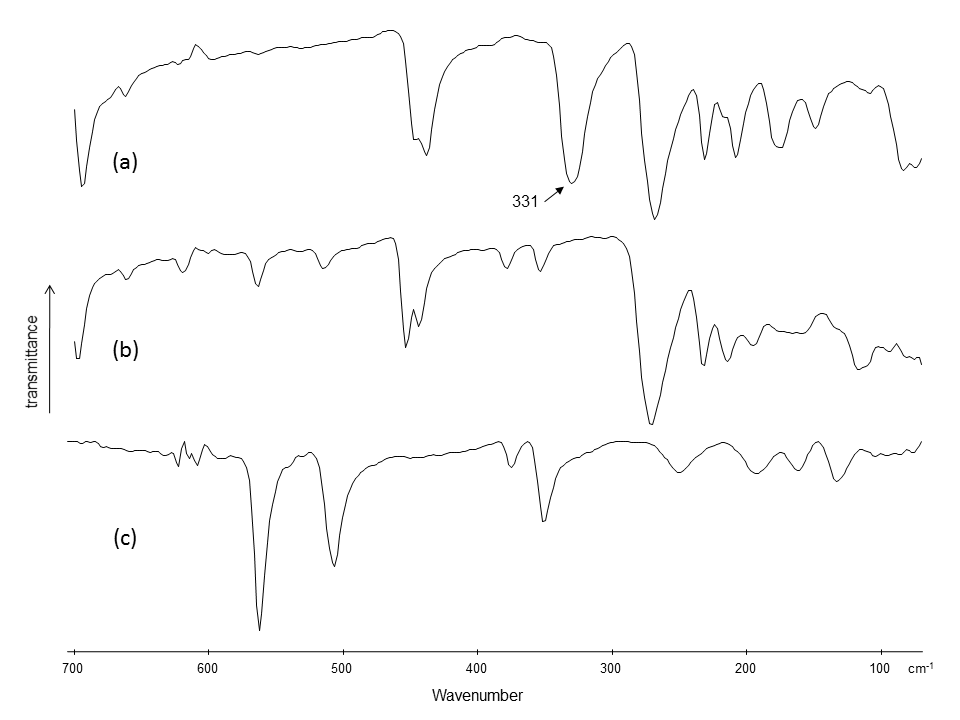
Figure S2.** Far Infrared spectra (ATR) of (a) Ph3SnCl, (b) **1** and (c) **L**.

**
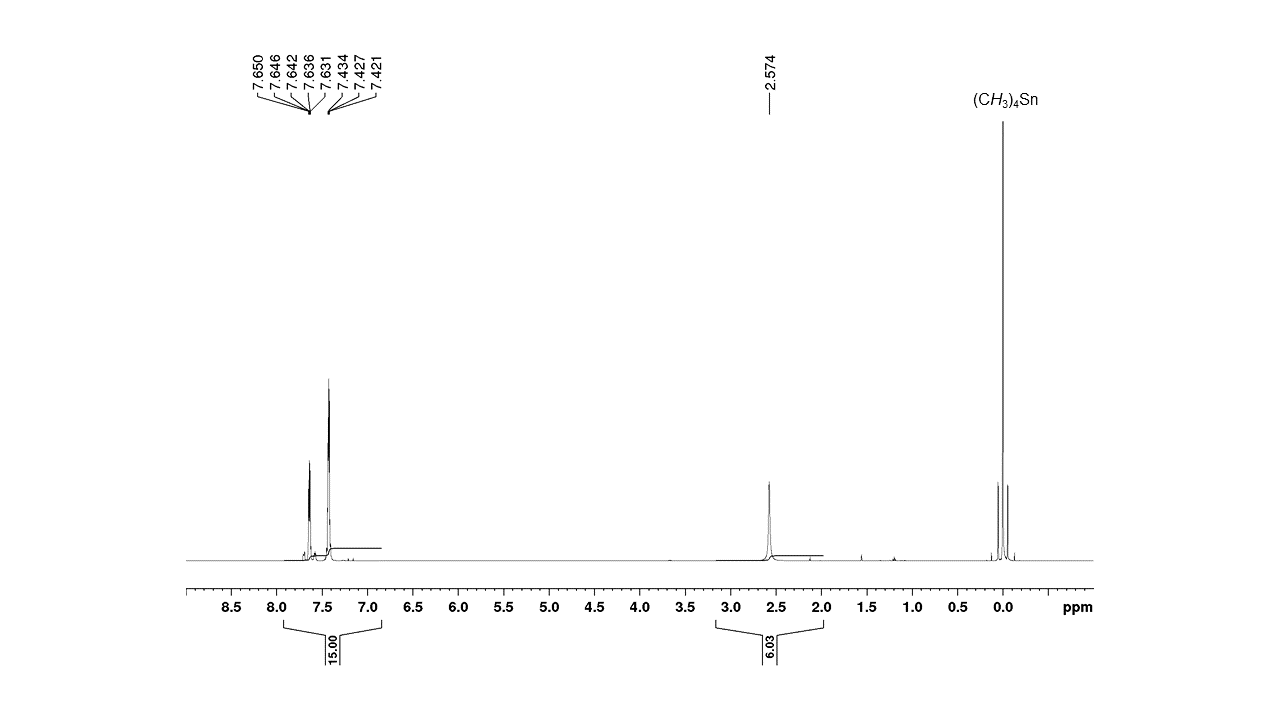
**

**Figure S3.** 1H NMR spectrum of **1** (CDCl3, 300 K).

**
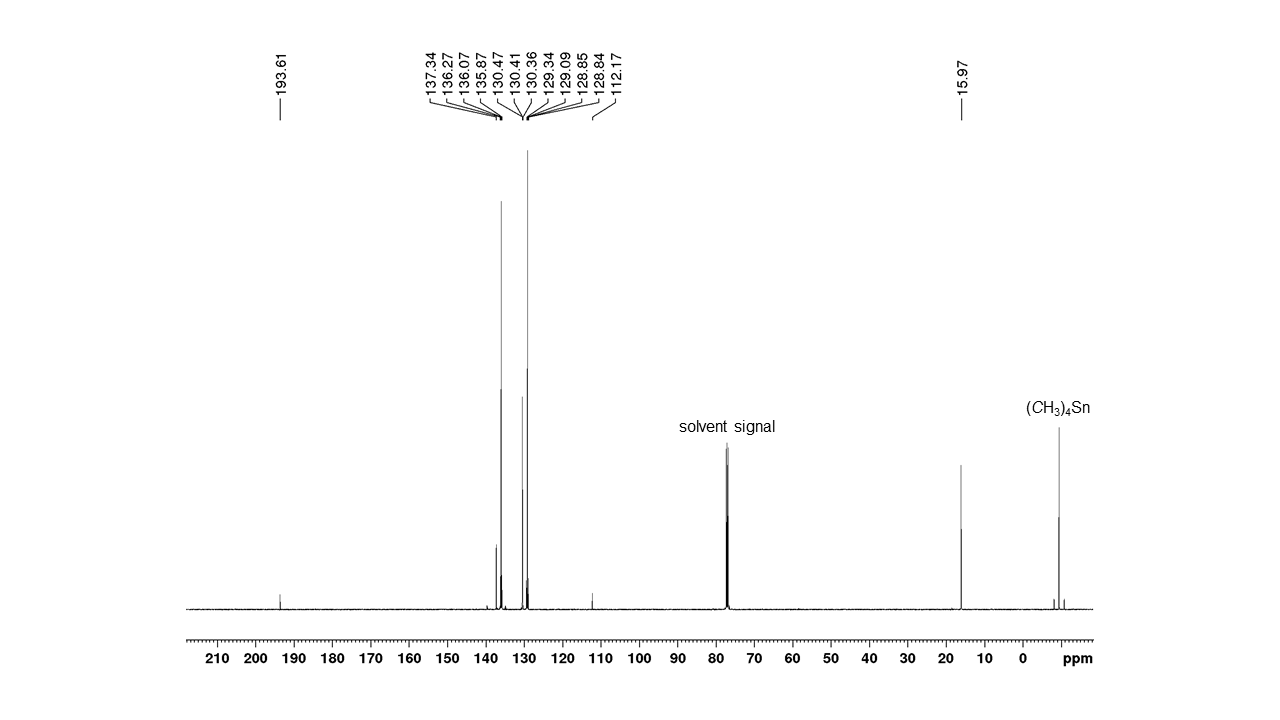
**

**Figure S4.** 13C{1H} NMR spectrum of **1** (CDCl3, 300 K).


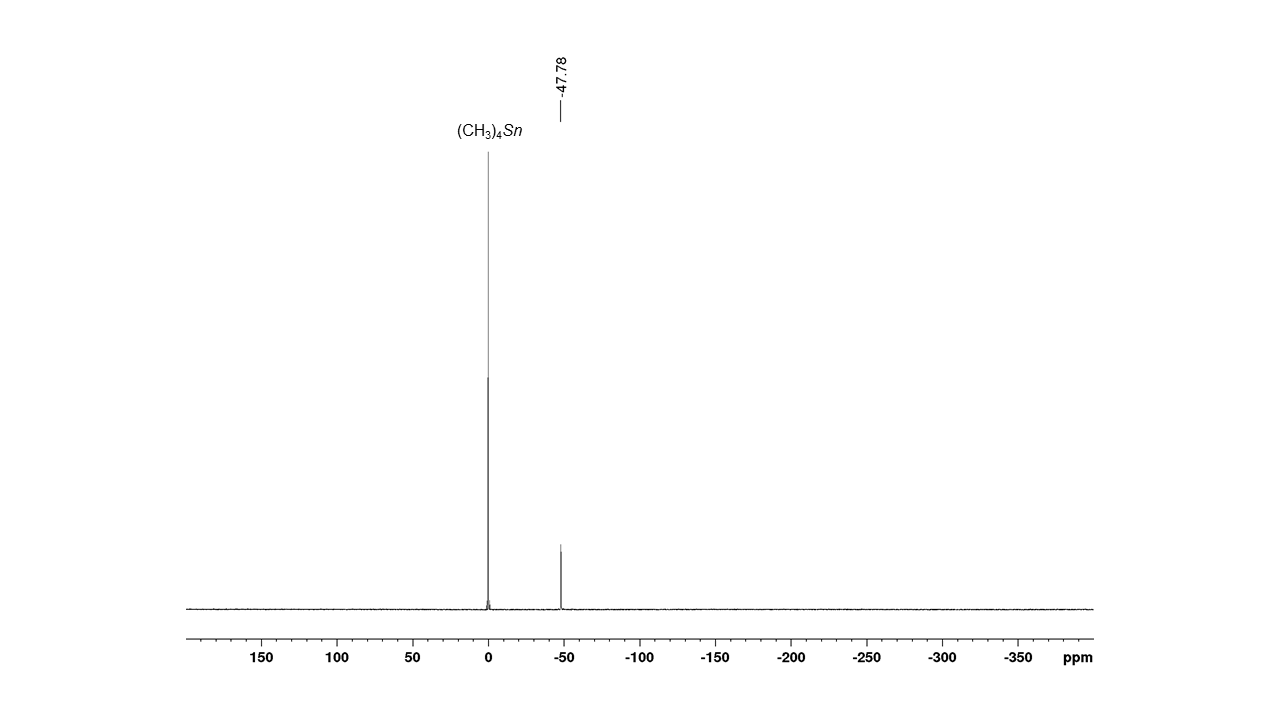


**Figure S5.** 119Sn{1H} NMR spectrum of **1** (CDCl3, 300 K).


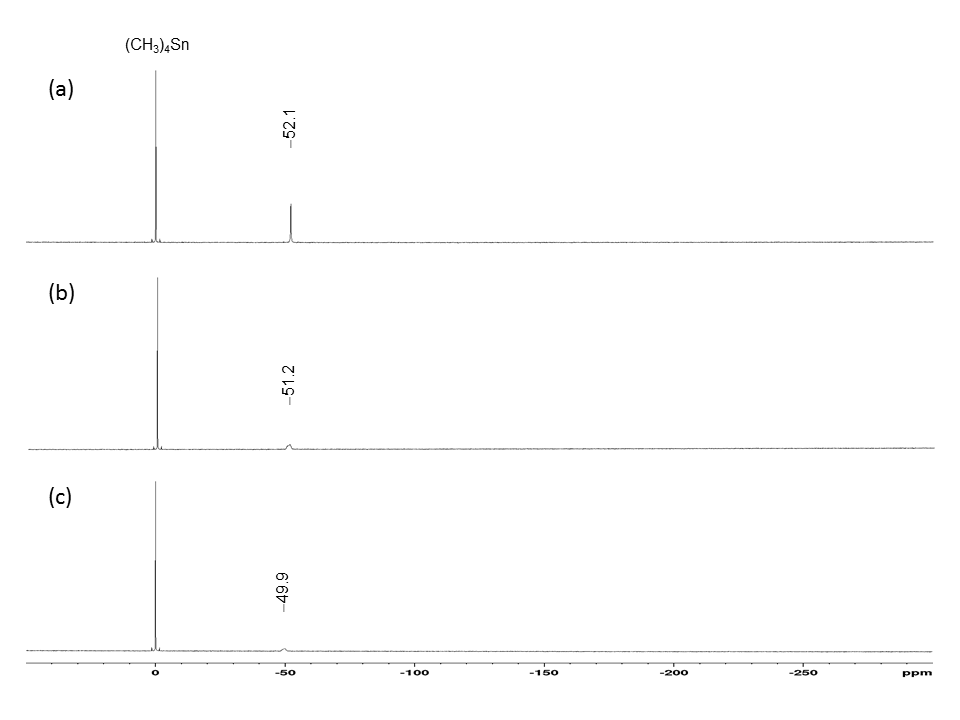


**Figure S6.** *δ*(119Sn{1H}) versus concentration of **1** (CD2Cl2, 300 K): (a) 2 M, (b) 1 M and (c) 0.5 M.

**
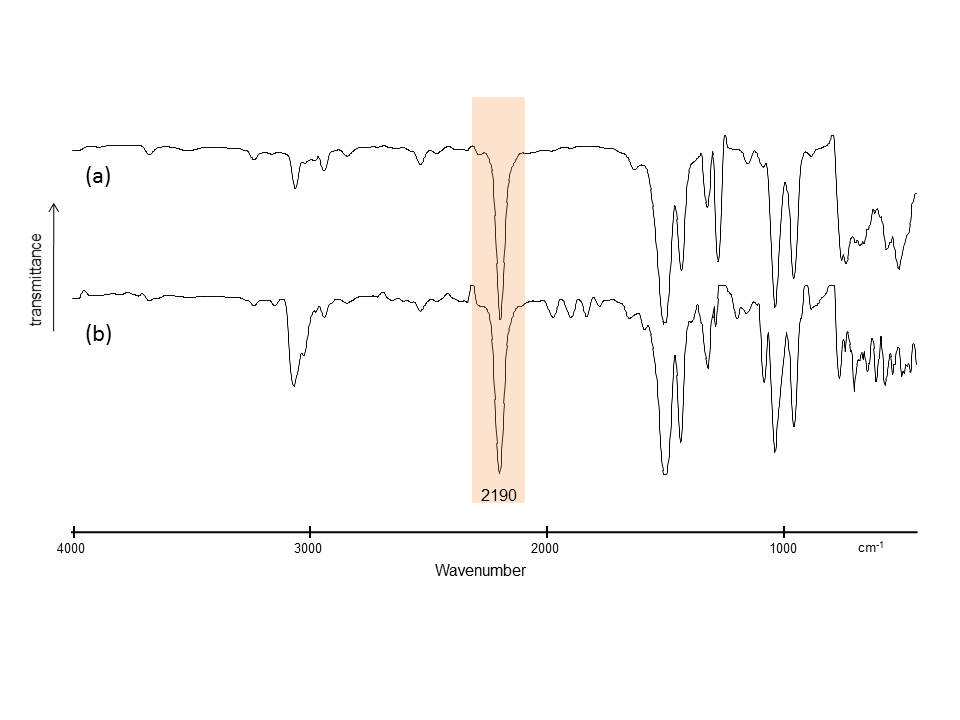
Figure S7.** Middle Infrared spectra (transmission) of (a) **L** and (b) **1** in dichloromethane solution.
